# Supplementary material for: A Multi-Omic Systems-Based Approach Reveals Metabolic Markers of Bacterial Vaginosis and Insight into the Disease
Source: PLoS One. 2013 Feb 6;8(2):e56111. doi: 10.1371/journal.pone.0056111 (PMC3566083; doi:10.1371/journal.pone.0056111)
Supplement: Table S1 — Microbial taxa and their relative 16S rRNA gene representation. (XLSX) [file pone.0056111.s006.xlsx]

## Sheet: Sheet1
Table S1 Microbial Taxa and their Relative 16S rRNA Gene Representation
Taxon	401	402	403	404	405	406	408	409	412	413	416	417	418	423	424	425	426	427	428	429	431	432	433	434	435	436	437	438	439	440	441	442	443	CC001	CC002	CC003
Lactobacillus	0.994072	0.998984	0.61557	0.99892	0.999376	0.99772	0.955556	0.210872	0.250228	0.999615	0.981381	0.813113	0.979721	0.998693	0.999287	0.987806	0.99893	0.999828	0.994957	0.999612	0.958174	0.991963	0.992841	0.0613057	0.967956	0.989379	0.99828	0.999407	0.00509968	0.975131	0.998012	0.869138	0.976689	0.423832	0.998005	0.619898
L.crispatus	0.00145173	0	0.000240645	0.148455	0.270152	0.00481403	0.0944444	0.000798085	0.000651466	0.489316	0.0190161	0.0303692	0.377627	0.304623	0.302561	0.151318	0.0123364	0.478557	0.139751	0.00287222	0.00174425	2.71533e-05	0.0349868	0.000361533	0	0.00861844	0.00281569	0.274768	0	0	0.0004896	0	0.000861934	0.000970739	0.00102268	0
L.gasseri	0.321498	0.322491	0.126579	0.0630063	0.0015072	0	0.00555556	0.0546245	0.0590879	0.00147584	0.128607	0.231273	0.00573678	0	0.000142684	0.0773297	0.199186	0	0	0.150442	0.154693	0.099218	0.22995	0.0159333	0.0167145	0	4.29876e-05	0	0	0.0824607	0.300718	0.044711	0.306339	0.121585	0.257599	0.0318878
L.jensenii	0.000302444	0	0	0.00486049	0.011226	0.000152022	0.00555556	0	0	0.00064167	0	0.00172335	0.000266827	0	0.000214026	0.0222688	0.168072	0	0.0829691	0	0	0	0.00839512	0.000284062	0.0463851	4.35275e-05	0.246104	0.024157	0	0.0091623	0.00200291	0	0.00677793	0.00291222	0.0278304	0
L. iners	0.4	0.07	0	0.04	0.001695	8.1e-05	0	0.01285	6.375e-05	0	0.191	0	0	0	0	0.05375	0	0	0	0	0.03975	0	0.09475	0.015975	0	0	0	0	0	0	0.45	0	0.3975	0	0.52	9.2e-05
Lactobacillus (other)	0.27082	0.606492	0.48875	0.742598	0.714796	0.992673	0.85	0.142599	0.190425	0.508181	0.642758	0.549747	0.596091	0.69407	0.696369	0.683139	0.619335	0.52127	0.772237	0.846297	0.761987	0.892717	0.624759	0.0287518	0.904856	0.980717	0.749318	0.700482	0.00509968	0.883508	0.244801	0.824427	0.26521	0.298364	0.191553	0.587918
Abiotrophia	0	0	0	0	0	0	0	0	0	0	0	0.00011489	0	0	0	0.000124685	0.0193	0	3.73566e-05	0	0.000181693	0	0	0	4.94511e-05	0	0	0	0	0	0	0	0	0	0	0
Acidovorax	0	0	0	0	0	0	0	0	0.00019544	0	0	0	0	0	0	0	0	0	0.000149427	0	0	8.14598e-05	0.000681838	5.16476e-05	0	0.000565857	4.29876e-05	0	0	0	1.48364e-05	0	0	0	0	0
Acinetobacter	0	0	0	0	0	0	0	8.86761e-05	0.00651466	8.5556e-05	3.3129e-05	0	0	0.000104592	0	0.000822922	6.29406e-05	5.93236e-06	0	7.76277e-05	0	8.14598e-05	0.00178982	0	0	0.00496213	8.59753e-05	6.98178e-05	0	0	0	0	0	0.000208016	0	0
Actinomyces	0	0	0	0	0	0	0	0	0	0	0	0	0	0	0	0	0	0	0	0	0	0	0	0	0	0	0	0	0	0	1.48364e-05	0	0	3.46693e-05	0	0
Aerococcus	0.000120977	0	0.0430754	0	0	0	0	0.12991	0.052443	0	6.62581e-05	0.0123315	0	0	0	0	0	0	0	0	0	0	0	0.00142031	0	0	0	0	0	0.0026178	0.000726981	0.00436205	0	0.0847663	0	0.0114796
Alicycliphilus	0	0	0.000120322	0	0	0	0	0	0	0	0	0	0	0	0	0	0	5.93236e-06	0	0	0	0	0	0	0	0	0	0	0	0	0	0	0	0	0	0
Allisonella	0	0	0	0	0	0	0.0166667	0	0	0	0	7.65931e-05	0	0	0	2.4937e-05	0	0	0	0	0	0	0	0.00139448	0	0	0	0	0	0	0	0	1.95894e-05	6.93385e-05	0	0.00255102
Allobaculum	0	0	0	0	0	0	0	0	0	0	0	0	0	0	0	0	0	0	0	0	0	0	0	0	0	0	0	0	0	0.0170157	7.41818e-05	0.0676118	0	0	0	0
Alloscardovia	0	0	0	0	0	0	0	0	0	0	3.3129e-05	0	0.00140084	0	0	0	0	0	0	0	0.000145354	0	0	0	0	0	0	0	0	0	0	0	0	0	0	0
Anaeroglobus	0	0	0	0	0	5.0674e-05	0	0	0	0	0	3.82966e-05	0	0	0	0	0	0	0	0	0	0	0	0.00118789	0	0	0	0	0	0	0	0	0	0.000138677	0	0
Aquabacterium	0	0	0	0	0	0	0.00555556	0	0	2.1389e-05	0	0	0	0	0	0.000324181	8.39208e-05	4.15265e-05	7.47133e-05	0	0	0.000135766	0.000468763	0	0.000148353	0.00191521	6.44815e-05	3.49089e-05	0.000132459	0	0.000133527	0	0	6.93385e-05	0	0
Arcanobacterium	0	0	0	0	0	0	0	0	0	0	0	0	0	0	0	0	0	0	0	0	0	0	0	0.000232414	0	0	0	0	0	0	0	0	0	0.000173346	0	0
Atopobium	0.000423421	9.24044e-05	0.0871135	0	5.19724e-05	0	0	0.0802518	0.0385016	0	9.93871e-05	0.0306373	6.67067e-05	5.22958e-05	0	0.000324181	0	0	0.000747133	0	0	0	0	0.106007	0	0	0	0	0.329293	0	1.48364e-05	0	0	0.0944737	0	0.0420918
Azonexus	0	0	0	0	0	0	0	0	0	0	0	0	0	0	0	0	0	0	0	0	0	0	0.000170459	0	0	4.35275e-05	0	0	0	0	0	0	0	0	0	0
Bifidobacterium	0	0	0	0	0	0	0	0	0	0	0	7.65931e-05	0.000333533	0	0	0	0	0	0	0	0	0	0	0	0	0	0	0	0.0029141	0	0	0.0283533	0	0.000346693	0	0
Bradyrhizobium	0	0	0	0	0	0	0	0	0	0	0	0	0	5.22958e-05	0	0	0	0	0	0	0	0	0	0	0	0	0	0	0	0	0	0	0	3.46693e-05	0	0
Bulleidia	0	0	0	0	0	0	0	0	0	0	0	0	0	0	0	0	0	0	0	0	0	0	0	0.000129119	0	0	0	0	0	0	0	0	0	0.000797393	0	0
Chryseobacterium	0	0	0	0	0	0	0	0	0	0	0	0	0	0	0	0	0	5.93236e-06	0	0	0	0	4.26148e-05	0	4.94511e-05	0.000261165	0	0	0	0	0	0	0	0	0	0
Cloacibacterium	0	0	0	0	0	0	0	0	0	2.1389e-05	9.93871e-05	0	0	0	0	0.000199496	0.000125881	5.33912e-05	0.00011207	0	0	0	0.00102276	7.74713e-05	0	0.00121877	0	6.98178e-05	0.000132459	0	1.48364e-05	0	0	3.46693e-05	0	0
Clostridium	0	0	0	0.00030003	0	0.000405392	0	0	0	0	0	0	0	0	0	0	0	0	0.00298853	0	0	0	0.00225859	0	0	0.00034822	0	0	0	0	0	0	0	0	0	0
Comamonas	0	0	0	0	0	0	0	0	0.0037785	0	0	0	0	0	0	4.98741e-05	0	0	0	0	0	8.14598e-05	0.000255689	0	0	4.35275e-05	0	0	0	0	0	0	0	0	0	0
Corynebacterium	0	0	0	0	0	0	0	8.86761e-05	0.000130293	0	0	0	6.67067e-05	0.000104592	0	0.000149622	2.09802e-05	0	0	0	0	5.43065e-05	0	2.58238e-05	9.89022e-05	8.70549e-05	6.44815e-05	3.49089e-05	0	0	1.48364e-05	0	0	0.0018028	3.35306e-05	0
Delftia	0	0	0	0	0	0	0	0	0.000260586	0	0	0	0	0	0	0	0	0	0	0	0	0	0	0	0	0	2.14938e-05	0	0	0	0	0	0	0	0	0
Dialister	0	0.000184809	0.000601612	0	0	0	0	0.00656203	0.00136808	0	0	0.0121783	0.0030018	0	0	0.00024937	0	0	0	0	0	0	4.26148e-05	0.0766192	0	0	0	0	0.00953706	0	7.41818e-05	0.00218103	0.0074048	0.0362294	0	0.0242347
Diaphorobacter	0	0	0	0	0	0	0	0	0	0	0	3.82966e-05	0	0	0	4.98741e-05	0	1.18647e-05	0	0	0	0	0.000213074	5.16476e-05	0.000148353	0.00017411	8.59753e-05	0	0	0	8.90181e-05	0	0	0.000173346	0	0
Enterococcus	0	0	0	0	0	0.000405392	0	8.86761e-05	0	0	0	0	0.000333533	0	0	0	0	0	0	0	0	0	0	0	0	0	0	0	0	0	1.48364e-05	0	0	0.00128276	1.67653e-05	0.00255102
Escherichia/Shigella	0	0	0	0.000540054	0	0.00025337	0.00555556	0.000354704	0	0	9.93871e-05	0	0.00120072	0	0	0	0	0	0	0	0	2.71533e-05	0	0	0	0	0	0	0	0	0	0	0	0	0	0
Fusobacterium	6.04887e-05	0	0	0	0	0	0	0.0066507	0	0	0	0	0	0	0	0	0	0	0	0	0	0	0	5.16476e-05	0	0	0	0	0	0	0	0	0	0	0	0
Gardnerella	0.000423421	9.24044e-05	0.238238	6.0006e-05	0	0	0	0.150661	0.379023	0	0.000530065	0.0402497	0	0.000679845	0	0.00042393	0	0	0.000410923	0.000155255	0.016425	0	0	0.0378835	0.0314509	0	0.000408383	0	0.272998	0	0.000118691	0	0.0113227	0.0325544	0	0.0408163
Gemella	0	0	0	0	0	0	0	0.0145429	0.000325733	0	0	0	0	0	0	0	0	0	0	0.000155255	0.000690432	0	0	0.000361533	0	0	0	0	0	0	0	0	0	0.00908334	1.67653e-05	0
Granulicatella	0	0	0	0	0	0	0	8.86761e-05	0	0	0	0	0	0	0	0	0	0	0	0	3.63385e-05	0	0	0	0	0	0	0	0	0	0	0	0	0	0	0
Haemophilus	0	0	0	0	0	0	0	0	0.000260586	0	0	0	0	0	0	0	0	0	0	0	0.000726771	0	0	0	0	0	0	0	0	0	0	0	0	0	0	0
Hallella	0	0	0	0	0	0	0	0	6.51466e-05	0	0	3.82966e-05	0	0	0	0	0	0	0	0	0	0	0	0.000180766	0	0	0	0	0	0	0	0	0	6.93385e-05	0	0
Janthinobacterium	6.04887e-05	0	0	0	0	5.0674e-05	0	0	0.0259935	0	0	0	0	0	0	0	0	0	0	0	0	0	0	0	0	0	0	0	0	0	0	0	0	3.46693e-05	0	0
Klebsiella	0	0	0	0	0	0	0	0	0	0	0	0	0	0	0.000142684	0	0	0	0	0	0	0	0	0	0	0	6.44815e-05	0	0	0	0	0	0	0	0	0
Megasphaera	0	0	0	0	0	0	0	0	0	0	3.3129e-05	0.0568321	0	0	0	4.98741e-05	0	0	0.00044828	0	0	0	0	0.0934821	0	0	0	0	0.356712	0	0	0	0	0.00221883	0	0.00255102
Methylobacterium	0	0	0	0	0	0	0	0	0	0	0	0	0	0	0	0	0	0	0	0	0	0	0	0	0	0	6.44815e-05	0	0	0	7.41818e-05	0.00327154	0	0	0	0
Mobiluncus	0	0	0	0	0	0	0	0	0	0	0	0	0	0	0	0	0	0	0	0	0	0	0	0.00555211	0	0	0	0	0	0	0	0	0	0	0	0.00382653
Mycoplasma	0	0	0	0	0	0	0	0.012592	0	0	0.00278284	0	6.67067e-05	0	0	0	0	0	0	0	0	0	0	0	0	0	0	0	0	0	0	0	0	0.0288795	0	0.00127551
Olsenella	0	0	0	0	0	0	0	0.00230558	0	0	0	0.000306373	0	0	0	0	0	0	0	0	0	0	0	0.000180766	0	0	0	0	0.00105967	0	0	0	0	0.000658716	0	0
Parabacteroides	0	0	0	0	0	0	0	0	0	0	0	0	0	0	0	2.4937e-05	2.09802e-05	0	0	0	0	0	0	0	0	0	0	0	0	0	0	0	0	0	0	0
Peptostreptococcus	0	0	0.000601612	0	0	0	0	0.00274896	0.000521173	0	0	0	0	0	0	0	0	0	0	0	0	0	0	0.00304721	0	0	0	0	0	0	0	0	0	0.000381362	0	0
Porphyrobacter	0	0	0	0	0	0	0	0	0	0	0	0	0	0	0	0	0	0	0	0	0	0	0	0	0	0	2.14938e-05	0	0	0	0	0	0	6.93385e-05	0	0
Porphyromonas	0	0	0	0	0	0	0	0	0	0	0	0	0	0	0	2.4937e-05	0.000104901	0	0	0	0	0	0	0.00160107	0	0	0	0	0	0	1.48364e-05	0	0	0	0	0
Prevotella	0.000241955	9.24044e-05	0.00192516	0	0	5.0674e-05	0	0.107741	0.00723127	0	3.3129e-05	0.0339691	0.00233473	0	0	0.00164584	2.09802e-05	2.96618e-05	3.73566e-05	0	0.000145354	0.000217226	4.26148e-05	0.41615	0	0	2.14938e-05	0	0.021922	0	5.93454e-05	0.0152672	0.000391788	0.0246152	0	0.0854592
Propionibacterium	0	0	0	0	0	0	0	0	0	0	0	0	0	0	7.13419e-05	2.4937e-05	8.39208e-05	0	0	0	0	8.14598e-05	0	0	0	0	0.000343901	0	0	0	1.48364e-05	0	0	0.000312023	1.67653e-05	0
Pseudomonas	0.00205662	0.000184809	0.00180484	0	0.000103945	0.000557414	0.0166667	0.00044338	0.210033	0.000256668	0	0	0	0	0	0.00314207	0	0	3.73566e-05	0	0	0.000108613	4.26148e-05	0	0	4.35275e-05	0	0	0	0	0	0	1.95894e-05	0.000416031	0	0.147959
Ralstonia	0	0	0	0	0	0	0	0	0	0	0	0	0	0	0	0	0	0	0	0	0	0	0	0	0	4.35275e-05	0	0.000383998	0.000198689	0	0	0	0	0	0	0
Rheinheimera	0	0	0	0	0	0	0	0	0	0	0	0	0	0	0	0	0	1.18647e-05	0	0	0	0	0	0	0	0	2.14938e-05	0	0	0	0	0	0	0	1.67653e-05	0
Roseburia	0	0	0	0	0	0	0	0	0	0	0	0	0	0	0	9.97481e-05	0	0	0	0	0	0	0	5.16476e-05	0	0	0	0	0	0	0	0	0	0	0	0
Sneathia	0.00169368	0	0	0	0	0	0	0.145961	0	0	0.00202087	0	0.000133413	5.22958e-05	0	0.000174559	0	0	0	0	0	0	0	0.192336	0	0	0	0	0	0.0013089	0	0	0	0.213909	0	0.0127551
Sporacetigenium	0	0	0	0	0	0	0	0	0	0	0	0	0	0	0	0	0	0	0	0	0	0	0	0	0	0	0	0	0	0.0039267	0	0.00218103	0	3.46693e-05	0	0
Staphylococcus	0	0	0	0.000180018	5.19724e-05	0.000456066	0	0.00044338	0	0	0	0	6.67067e-05	0	0	4.98741e-05	0	0	0	0	0.00196228	5.43065e-05	0	0	0	0.000304692	0.000128963	0	0	0	2.96727e-05	0.00218103	0	0.00468035	1.67653e-05	0
Stenotrophomonas	6.04887e-05	0	0	0	0	0	0	0	0.00690554	0	0	0	0	0	0	7.48111e-05	0	0	0	0	0	0	0	0	0	0	0	0	0	0	0	0	0	0	0	0
Streptococcus	0	0.000369617	0	0	0.000311834	5.0674e-05	0	0.0313027	0	0	0.0113964	0	0.00286839	0.000104592	0	9.97481e-05	0.000104901	0	0	0	0.00472401	0.00697839	0	0	0	0	0	0	0	0	0.000400582	0.00109051	0	0.00915268	0.00114004	0
Streptophyta	0	0	0	0	0	0	0	0	0	0	0	0	0	0	0	0	0.000293723	0	0	0	0	0	0	0	0	4.35275e-05	0.000193444	0	0	0	0	0	0	3.46693e-05	0	0
Subdoligranulum	0	0	0	0	0	0	0	0	0	0	0	0	0	5.22958e-05	0	0.000224433	0	0	0	0	0	0	0	0	0	0	0	0	0	0	0	0	0	0	0	0
Ureaplasma	0.000302444	0	0.0109493	0	0	0	0	0.018888	0.0105537	0	0.00139142	0	0.00840504	5.22958e-05	0.000428052	0.00331663	0	0	0	0	0.0150805	0	4.26148e-05	0.000232414	4.94511e-05	0	0	0	0	0	0	0	0.00411378	0.0115102	0.000737673	0.00255102
Varibaculum	0	0	0	0	0	0	0	0	0	0	0	0	0	0	0	4.98741e-05	0	0	0	0	0	5.43065e-05	0	5.16476e-05	0	0	0	0	0	0	0	0	0	0	0	0
Veillonella	0.00048391	0	0	0	0	0	0	0.0771482	6.51466e-05	0	0	0	0	0	0	0	2.09802e-05	0	0	0	0.00170791	0	0	0	0	0	0	0	0	0	0	0	0	0.0133823	0	0
