# Supplementary material for: A Multi-Omic Systems-Based Approach Reveals Metabolic Markers of Bacterial Vaginosis and Insight into the Disease
Source: PLoS One. 2013 Feb 6;8(2):e56111. doi: 10.1371/journal.pone.0056111 (PMC3566083; doi:10.1371/journal.pone.0056111)
Supplement: Table S2 — Metabolites and their relative concentrations. (XLSX) [file pone.0056111.s007.xlsx]

## Sheet: Sheet1
Table S2 Metabolites and their Relative Concentrations
Ref	relative concentration	401	402	403	404	405	406	408	409	412	413	416	417	418	423	424	425	426	427	428	429	431	432	433	434	435	436	437	438	439	440	441	442	443	CC001	CC002	CC003
1	1-Acetoxy-2-Propanol	487.1	749.9	1394.6	480.2	1228.9	4807	1833.5	223.2	0	0	0	0	98.2	352.9	1212.4	564.7	2709.6	1789.8	304.8	2350.3	239.8	5085.1	335.5	0	1552.3	16619.6	5998.7	2141.9	10800.3	13087.6	3110	7589.3	0	0	4.1	0
2	1-Hydroxy-2-Propanone	201.7	218.7	112.9	225.8	127.6	543.1	837.2	103.2	85.4	171.2	120.9	71.6	1862.9	1007.6	2026.8	211.6	1214.1	1406.2	0	548.5	65	116.4	73.7	0	1971.2	1438	232.4	410.4	1310.1	466.2	331.8	2806.1	61.8	114.1	317.1	194.5
3	1-Methyl-4-hydroxy-1H-imidazol-2-amine	8.9	10	9.1	11.7	14.4	15.1	14.7	12.2	16.9	9.8	5.4	3.1	14.4	10.5	14.9	14.4	11	11.1	10.1	14.3	10.5	10.7	10.9	10.3	10.5	11.1	11	11.7	11.2	13	13	12.2	5.2	4.8	10.8	3.2
4	1-Methyl-beta-D-galactopyranoside	5.2	8.5	5.1	5	14.5	19.7	21.4	0	4.5	4.1	7.1	3.9	91.3	153.4	25.9	5.4	20.5	136.1	4.8	4.1	0	33.8	2.1	33	12.4	20.6	5.6	282.1	4.8	141.6	2.8	115.1	0.9	5.2	28.1	1.1
5	1-Monohexadecanoylglycerol	0	0	0	0	0.8	3.8	0.6	0	0	0	0	0	0.3	1.9	4.7	0.9	0.6	1.5	0	4.9	0	0.5	0	2.1	0.7	1	0.3	8.3	1.6	1.4	1.1	1.4	0.5	0	1.3	1
6	1-Monooctadecanoylglycerol	0	0	0	0	2.1	2.1	2	0	0	0	0	0	4.8	7.4	3.7	1.1	0.5	5	0	9	0	2	0	5.4	1.3	1.7	0.4	8.9	1.1	2.9	3.4	1.9	1.4	0	1.9	1.1
7	1,2-Propanediol	20326.8	23816.2	18574.6	23107	37104.9	86890.3	55703.6	23909.5	261.8	558.9	587.6	198.3	15535.5	39716.6	41280.1	42330.6	60327.6	45770.7	26327	60793.6	25695.8	47590.9	22620.7	87	57727.6	180957	101136	59009.1	83528.5	161487	20403.7	96460.2	106.1	294.3	4810.3	5009
8	1,2-Propanediol, 2-acetate	347.2	372.7	253.4	229.7	764.9	4366.4	1014.2	132.4	0	0	0	11.9	120.9	144.7	797.8	343.7	1215.8	926.8	208.9	1225.4	124.5	2256.4	195.9	0	930.8	4301.8	1144.8	1124.8	4142.4	5062.1	3252.3	3765.9	0	8.2	0	0
9	1,3-Dihydro isobenzofuran	233.3	132.9	54.8	160.7	638.7	395	214.1	30.1	34.5	28.9	27	59.1	809.8	495.7	1026.2	292.4	390.6	383.7	35.9	1912.6	22.6	424.1	46.7	48.1	193.4	327.4	200.8	914.2	163.7	315.1	512.4	231.8	72.9	48	161.5	50
10	1,3-Dipropylene glycol	7.9	11.1	16.4	9.4	18.5	57.7	23.4	4.6	0	0	0	0	0	0	204.5	85	36.6	19.1	8.1	25.7	4.5	22.7	8.1	56.6	85.2	320.3	418.3	138.8	179.9	2464.4	61.3	133.2	78.4	0	77.7	0
11	1,4-Dimethyldioxane	134.8	270.2	98.6	157.8	140.8	313.1	734.7	87.6	0	0	0	0	43.4	56.1	122.4	34.1	180.4	570.2	101.9	840.7	89	202.2	103.5	0	121.4	821.6	478	162.8	773.7	22.8	1015.9	2719.9	0	0	14	0
12	11-Eicosenoic acid	0.3	0.5	0	0	0.3	0.3	0	0.5	0.9	0.8	0.8	1.7	0.5	0	0.5	0	0.4	0	1	0.9	0.7	0.4	0.7	1	0	1.1	0	0.4	0	0.8	0.6	0	0	0.7	14.9	1.1
13	11-Octadecenoic acid	74.2	90	15.4	46.1	5.1	10.8	3.5	6.2	0	0	0	0	54.8	50.2	105.7	10.4	9.1	23.7	2.8	8.8	4	3.5	7.8	544	22.4	231.4	15.3	21.4	5.6	4.2	21.4	6.3	10.8	0	216	304.6
14	2-Aminoadipic acid	4.5	3.6	0	4.8	1	1.2	0.7	0	2.1	6.3	5.4	0	4.7	2.5	5.5	3.8	1.1	1.3	0	4.6	0	2.9	0	2.9	0	0	0	10.7	0	1.8	12	1.8	3.6	0	0	6
15	2-Aminoethylphosphate	10.6	7.7	7.9	11.4	15.6	16.4	16	15.8	26	8.5	6.2	5.8	18.3	21.9	18.2	18.2	9.2	19.1	12.1	42.5	10.9	18.1	14.4	6.8	9.4	6.6	12.3	46.5	10.4	14.7	12.9	21	4.5	2.8	11.5	5.4
16	2-Desoxy-pentos-3-ulose	0	0	1.7	0	7.9	9	10	0	0	0	0	0	53.2	28.7	32.5	10.7	10.7	14.7	0	4	0	19.8	0	3	12.5	34.6	2.3	0	25	5.4	2.3	22.6	4	0	13.8	5.9
17	2-Ethyl-4-methyl-1,3-Dioxolane	327.2	462.8	114.8	313.6	140.3	1192.4	912.1	166.2	0	40.1	18.2	0	143.2	132.6	357.6	116.8	619.2	634.3	179.1	862.1	193.1	291.8	296.6	21.2	380.3	1275.4	639.8	471.3	2918.5	5476.1	1200.6	3026.5	0	0	12.3	0
18	2-Hydroxy-3-methyl-2-Cyclopenten-1-one	2.4	2.5	2.9	1.8	0	0	6	1.4	0	1.4	0.6	0	7.8	0	17.9	0	14.8	8.7	0.9	17.4	1	0	1.8	0	16.8	9.4	0	0	12.4	0	5.4	33.5	0	0	3.4	0
19	2-Hydroxy-gamma-butyrolactone	22.4	18.3	21.9	19.9	9.4	41.2	81.7	14.8	0	13.4	20.1	9.2	239.7	83.6	298.8	6.7	161.6	215	20.7	26.5	17.1	14.7	63.8	34.1	348.2	211.2	9.6	13.3	260.5	59.7	11.5	594.5	18.6	14.6	28.1	7.4
20	2-Hydroxyglutaric acid	2.4	3	7.2	3.3	3.3	5	4.2	2.5	2.8	1.2	2.7	14.5	1.1	0	5.8	6.2	0	4.7	3.4	2.1	2.9	0	3	4.3	0	0	0	11.6	17.4	2.6	0	1.7	1.9	18.6	0	2
21	2-Keto-gluconic acid	0.5	0.4	0.2	0.7	0.9	0.3	0.3	0.3	0	0	0	0.5	1.3	0.3	0.6	0.6	0.5	0.4	1.2	0.4	0.3	1.2	0.5	1	0.5	0	0.3	0	0	0	0.6	0.8	0	0.7	0	0
22	2-Methyl-2-hydroxybutanoic acid	0	0	0	0	0	0	0	0	0	1.6	2.7	0	0.4	0	0	0	0	0	0.2	0.4	0	0	0.2	3.3	0	0	0	0	0	0	0	0.2	3.4	0	0	2.2
23	2-Methyl-2,3-hydroxypropanoic acid	0.5	0	0.3	0.3	0.4	0.4	0.5	0.6	0	0.4	0.3	0	0.6	0.2	0.3	0.5	0.5	0.4	0.4	0.3	0.4	0.5	0.8	0.7	0.5	0.7	0.5	0	0.5	0.2	0.3	0.3	0.5	0	0.3	0.3
24	2-Methylbenzoic acid	0	0	1.2	0	9.4	8.4	11.4	1	0	0	0	1.3	9.2	12.4	16.1	8.7	20.5	9.3	1.8	9.2	1.5	17.1	2.8	17.3	33.1	23.5	19.1	15	20.3	8.9	13.5	7.3	22.5	1.2	15.3	17
25	2-O-Glycerol-beta-D-galactopyranoside	9.8	12.6	9.5	13.4	43.5	5.6	4.8	7.4	0	0	0	0.5	40.9	106.2	4.1	1.6	43.9	35.4	11.8	121.4	5	41.8	20	3	23.7	28	7.4	24.6	101.6	7.2	13	22.1	0	0.4	0	0
26	2,3-Hydroxypropyl 2-aminoethylphosphate	6.3	3	2.8	8.6	5.9	4.6	2.9	3.6	20.4	3	2.6	0.9	9.8	7.6	22.8	2	0.4	4	2.9	17.5	3.2	0.9	3.3	0	2.9	0.1	2.5	25.2	1	3.2	5.1	2.9	0	0.8	2.8	0
27	2,4-Hydroxybenzoic acid	0.3	0.2	0.3	0.3	0	0.1	0	0.2	0	0.2	0.4	0.2	0	0.1	0.2	0.2	0.2	2.2	0.2	0	0.1	0.2	0.2	0	0	0.4	0	0.1	0.1	0.2	0.2	0.2	0	0.2	0.1	0
28	2(5H)-Furanone	88.6	46.3	52	58.8	66.9	333.1	476.4	30.4	45.4	159.5	101.2	42.5	719.4	225.8	1646.8	113	504.4	55.6	38.7	105.8	44	30.3	21	52.4	823.9	493.9	73.1	93.1	460	175.4	123	915.9	20.3	26.7	92.9	61.7
29	3-Hydroxybutanoic acid	0	0	0.9	0	0.5	1.5	0	0.7	0.9	0	0	2	5.8	0	3.7	1.7	2.4	2.9	1.5	0	0.9	5.2	1	1.4	1.6	3.6	0	2.4	1.8	0	3.6	3.3	5	2.7	0	3
30	3-Indole lactic acid	0.8	0.8	0.3	1	0.7	2.8	0.5	0.7	0.9	0.8	0.7	0.3	1.6	0.3	0.6	0.5	0	0.3	0.2	1.7	0.6	0.2	0.2	0	0	0	0	7.5	0.3	0.9	0	0.9	0.4	0.3	0	0.5
31	3-Methyl-2-hydroxybutanoic acid	0	0	0.8	0	0	0	0	2.1	0	0	0	1.9	0	0	0	0	0	0	2.9	0	2.5	0	1.1	0	0	0	0	0	0	0	0	0	0	2.1	0	0
32	3-Methyl-2-hydroxypentanoic acid	0	0	1.2	0	0	0	0	1.6	0	0	0	1	0	0	0	0	0	1	0.9	1	1.5	0	0.9	0	0	0	0	0	0	0	0	0	0	0.9	0	0
33	3-Methyl-3-hydroxybutanoic acid	0	0	0	0	0	0.8	0	0	0	0	0	0.3	1.4	0.8	0.6	1.1	0.9	0.9	0	0.5	0	1.1	0	1	1.7	1.5	1.6	1.7	1.9	1	1.3	2	1.2	0.2	2	1
34	3-Phosphoglycerate	0.4	0.3	0.2	0.4	0.5	3.6	0.4	0.6	2	0.6	0.6	0.2	6.7	3.4	2.8	0.4	1.2	3.6	0.2	4	0.4	0.9	0.2	0.1	1.3	2.1	2	3.7	2.1	1	2.1	2.3	0	0.2	2.3	0.2
35	3-Pyridinecarboxamide	46.6	10.2	0	61	62.5	29.2	42.1	0	0	0	0	0	140	162.5	254.8	84.4	92.1	109.2	0	167.7	0	80	0	0	81	45.6	54	453.8	31.8	87	162.6	26.1	8.5	0	28.7	0
36	3,4,5-Trihydroxypentanoic acid	0.7	0.7	0.2	0.5	0.3	0.4	0.3	0.8	0	0	0	0.7	0	0	1.3	0	0	0	0.9	0	0.7	0	1.1	1.5	1.2	2.2	0	0	0	0	0	0	1.1	0.8	0	0.9
37	4-Hydroxybutanoic acid	0.7	0.5	6.5	1	0	1.4	0.5	5.5	0	0.2	0.2	0.1	0	2.2	1.5	1	0	2.4	9.1	3.2	6.9	5.5	12	8.5	2.1	2.8	1.8	2.5	106.1	1.2	0	4.9	7	0.1	3.2	53
38	4-Methylbenzaldehyde	146.1	91.5	61.1	131.3	156.6	108.7	124.9	31.9	118.6	80.6	102	96.5	0	0	0	315.1	388.4	60.8	49.7	93.7	68.8	0	53.1	52.4	112.5	0	109.2	0	223.3	92.1	0	109.5	136.9	86.6	287.8	112.6
39	5-Alpha-Cholestan-3-ol	0.5	0.5	0	0.3	0.8	0.8	0.4	0	0	0	0	0	3.2	1.5	0.5	0.4	0	2.6	3.5	2.2	0	3.4	0	0	0	0	3	2.5	2.6	0	3.2	2.3	0	0	0	3.3
40	9-Octadecenoic acid	3.9	4.1	4.3	3.3	6.4	22.2	5.8	5.6	5.7	3.2	5.3	1.6	39.8	94.6	7.3	22	21.5	16.3	15.4	48.1	4.2	35.2	189	407.7	22	335.1	26.5	30.8	23.3	19.2	94.2	20.8	24.9	2.4	400.2	473.9
41	9,12-Octadecadienoic acid	1.4	1.4	2.1	2.8	2.8	2.9	2	2.3	2.8	1.1	1.7	0.8	4.4	3.8	4.1	1.7	2	3.1	7	4.9	1.9	4.1	1.4	9.1	2.5	2.9	3.5	2.9	4.4	2.1	9.6	3.6	1	1	3.4	5.3
42	a-Glycerophosphorylglycerol	0	0	0	0	11.2	12.7	12.1	0	0	0	0	0	17	9.5	25.4	3.4	1.3	3	3.7	10.7	0	0.8	1.4	1.2	0.9	5.1	0	23.5	1.4	4	8.9	1.3	0	0	2.4	0.9
43	a-Hydroxybenzenepropanoic acid	1.7	2	1.9	1.9	0	0	0	0.8	5.3	1.7	1	1.5	0	0	0	0	0	0	0	0	1	0	0	0	0	0	0	0	0	0	0	0	0	1	0	0
44	a-Ketoglutaric acid	0.3	0.4	0	0.3	0	0	0	2.9	0	0	0	0.5	0	0	0	0	0	0.8	3.4	0	2.6	0	4.2	0	0	0	0	0	0.6	0	0	0	0	0.4	0	0
45	a-Tocopherolacetic acid	92.1	0	0	0	173.6	226.5	192.5	0	0	0	0	44.1	92.8	329.8	288.7	189.2	32.7	96.2	115.2	213.1	58.8	160	66	293.7	67.8	56.5	38.9	7.9	49.1	172.3	66.4	91.7	65.6	32	75.8	90.2
46	a,4-Hydroxybenzenepropanoic acid	3.5	2.5	4.4	3.5	6.9	3.3	0	6.3	2.3	3.8	3.3	1.4	0	0	0	0	0	0	0	0	7	0	2.4	2.2	0	0	0	0	0	0	0	0	5.1	1.9	0	1.7
47	Acetamide	42.7	36.6	26.4	47.2	119.9	44	44.7	24.9	39.4	17.5	14.1	280.1	250.3	170.3	183.3	53	304.7	57.4	20	0	30.1	19.6	13.7	15.4	0	84.7	73	374.9	102.8	0	0	0	159	177.4	91.5	102.4
48	Acetic acid (Acetate)	849.3	902.1	938	1063.8	1928.5	988.2	2157.2	1486.4	1191.8	645.8	859.6	807.8	3343.1	2015	2872.2	1337.9	3102	3167.8	1120.6	3339.5	1753.2	1052.5	1476.9	998.4	3073	10052.6	5077	4594.6	14209.5	9268.8	4884.4	7124.3	1224.2	962.3	1544.6	1389
49	Adenine	2.3	2.2	2.1	3.3	1.7	0.8	2.2	3.5	6.1	2.4	1.9	1.2	0.4	0	3.6	0	0	0.1	2.3	8.6	2.2	0	2	1.8	0	0	0	2.1	0	0.2	1.1	0	2.9	1.6	0	1.2
50	Adenosine	0.9	0.9	1.8	1.1	1	1.7	1.5	0	0	0.3	0.3	0.2	2.4	8.6	2.5	1	0	1.4	2.1	2.3	0	1.3	2.2	2.2	0	2.8	0	2.9	0	1.4	0.8	1.3	0	0.2	0	0
51	Alanine	38.3	31.5	38.8	27.1	52.6	55.4	49.4	23.1	74.9	31.9	21.6	22	249.3	94.2	63.4	107.9	27.2	102.3	27.4	98.2	25.5	22.9	31.3	18.5	82.9	124.9	28	185.3	45.7	93.7	38.2	90.7	19.3	26.6	41.7	61
52	Aminomalonic acid	0.5	0.3	0	0.3	0.9	0.6	0	0	0.9	0.4	0.3	0.1	1.5	0.4	1.4	0.7	0.7	0.4	1.5	0.8	0	1.2	1.8	0	0	1.2	0	1	0	0.8	0.6	0	0.9	0.1	0.6	0
53	Arabitol	1.4	1.1	1.4	1.1	7.8	12.8	13	1.5	3.2	0.7	0.6	0.4	24.6	14.3	14.9	6.1	12.5	19	1.2	12.1	1.5	14.3	1	11.7	11.5	6.9	12.4	21.5	27.7	11.4	12	14.6	3.9	0.6	14.9	0.3
54	Asparagine	3.2	2.2	1.9	1.9	25.2	3.6	3	0	6.7	1.6	1.3	0.8	0.7	1.9	4.1	5.2	0	4.1	6.1	6.3	0	0	6.5	0	0	0	0	6.8	0	0	4.4	0	0	0.5	0	0
55	Aspartic acid (Aspartate)	93.9	70.6	4	58.6	113.4	98.4	118.6	3.6	149.8	24.3	27.4	6.5	115.3	57	112.5	122.8	8.3	124.9	7.5	144.9	4	50.6	7.7	39.1	18.6	11.1	14.1	113	10.1	17.8	86.5	13.7	6.8	6	15	7
56	Azelaic acid	1.9	1	2.3	0.8	0	0	0	0.3	1.5	0.5	0.6	0.5	0	0	0	0	0	0	0	0	0.5	0	0	0.6	0	1.1	0	0	0	0	0	0	0	0.4	1.2	0.6
57	b-Alanine	1.5	1.3	1.3	1.6	0.9	1.2	1.5	0.5	3.5	2	2.6	1.7	1.7	0.5	1.3	1.2	0.2	0.9	0.7	1.4	0.7	0.1	0.4	1.8	0.5	0.6	0.2	2.9	0.8	3.1	3.5	1.6	0.5	1.4	0	0.9
58	b-Phenyllactic acid	0	0	0	0	1.2	4.7	0.9	0	0	0	0	0	10	3.1	5.1	4	2.8	4.1	2.2	9	0	1.6	1	0.4	3.4	3	0.1	2.9	2.6	1.6	0.6	2	0.3	0	0.2	10
59	Benzoic acid	0	0	0.5	0	1.1	1.1	0.7	0.5	0	0.7	0.6	0.9	1.9	2.7	2	2.2	2.1	2.3	1.4	1.7	0.7	2.8	2.4	2	3.7	2.5	1.6	0.7	4.2	1.5	1.5	1.9	8	0.8	3.8	2.7
60	Butylamine	18.9	21.7	27.8	22	21.7	19.8	18.6	26	20.4	22.7	21.3	18.7	15.3	9.1	12.4	37.6	22.8	13.3	21	12	20.4	21.1	14.4	13.6	23.8	27.3	19.2	12.4	11.5	17.2	11.9	12.7	18.6	25.2	15.8	15.2
61	Butyrolactone	15.3	10.5	14.3	11.9	21.9	48.5	64.7	10.1	41.8	39	31.8	21.1	146.4	51.6	295.6	24.4	82	89.7	16.3	38.1	15.6	0	23.3	34.2	237.4	74.7	17.6	39.6	438	35.4	44.5	317	49.7	23.8	20.1	659.6
62	Cadaverine	3.9	2.8	22	4	0	0	0	13.5	4.7	0	0	25.8	7.8	2.2	4.1	0	0	0	9.4	0	17.6	0	10	128	0	3.1	0	0	2.6	0	0	2	173	26.4	0	123.2
63	Cholesterol	9.1	11.9	11.5	9.6	258.9	219.9	186.7	9.8	16.7	10.6	55.3	12.4	701.5	484.9	244.7	162.1	50.8	406.2	812.5	699.6	13.2	165.9	144.4	144	186.9	164.7	221.3	271.8	187.5	161	339.8	151.6	160.4	8.5	132.2	184.4
64	Citric acid	4.9	4.3	2.8	3.1	0.6	0.6	0.7	2.3	31.7	1.3	1.3	1.3	3.1	3.5	12.5	9.8	1.9	3.8	3.6	11.7	3.7	5.6	2.6	1.3	0.8	6.4	0.5	0	6.6	0.9	8.6	4.7	0.3	1.6	1.3	1.4
65	Cyclopentanol	68.1	73.5	35.7	94.8	16.8	239.8	84	31.8	2.9	81.9	80.6	35.2	348.3	207.3	142.7	172.3	968.2	734.9	74.8	88.6	26.6	227.7	159.1	75.1	962.8	575.6	132.6	478.8	711.8	290.4	64.1	325.1	14.9	29.4	139.2	41.6
66	Decanoic acid	1.9	1.3	2.3	1.8	1.2	2.3	2.3	3.6	1	2.7	2.1	1.5	1.4	1.5	2.5	2.4	2.3	1.4	2.3	1.2	2.5	2.4	3	1.7	1.5	2	1.4	2.1	1.8	1.6	1.7	1.5	2.8	2.4	2.6	2.2
67	Dehydroabietic acid	0	0	0	0	1.4	1.4	4.7	0	0	0	0	0	9.1	26	52	9.7	6.2	9.7	1.8	11.2	0	7.9	65.6	88.1	10.6	93.4	10.1	0.6	12.6	8.9	31.5	7.3	11.1	0	93.2	76.1
68	Dehydroascorbic acid	24.5	23	10.2	29.3	3.4	28.4	3	2.8	0.8	18.9	11.5	2.6	1.4	4.8	26.1	9.4	1	7.3	12.4	7.9	2.8	5	9.4	1.4	11.3	0	10.3	0	7	1.4	20.1	15.8	2.2	1.2	10.8	0
69	Diethanolamine	0.8	0.6	0.7	0.6	0.5	0.5	0.4	0.7	0.6	0.6	0.4	0.7	0.2	0.6	0.4	0.3	0.4	0.3	0.8	0.4	0.4	0.4	0.7	1	0.8	1.6	0.8	0.6	0.5	0.6	0.2	0.4	1	0.5	1.5	2.3
70	Diethyleneglycol	0.7	0.7	0.8	0.6	9	0	0	0.9	26.5	1.9	1.6	1.9	0	0	0	0.4	0	0.9	0	0.9	1.1	0	0.8	2.6	1.8	0	1.2	0	0	0	0	0	10	1.6	9.5	4.3
71	Docosanoic acid	0.2	0.2	0	0.2	1.9	0.9	1.7	0	0.2	0.2	0.3	0	2.6	0.7	2.4	1.2	0.5	1	2	4.7	0	1.9	1.6	5.6	1.3	2.8	0.8	2.7	1.3	1	3.2	1.2	2.4	0	2	5.1
72	Dodecanoic acid	9.2	7.3	8.1	12.8	1	6.7	1.7	5.7	7.1	7.2	6.2	3.7	2.6	5.4	10.8	5.6	1.9	2.3	5.6	2	6.5	4.2	10.8	39.5	1.8	7.2	1.8	0	6	2.1	5.9	1.6	5.6	4.4	81.7	36.5
73	Eicosanoic acid	0.9	1.2	0.7	1	1.5	1.6	2.8	0.8	1.1	1.1	0.7	1.6	6.3	5.9	3.4	3	1.8	1.6	3.5	5.2	1.1	2.8	5.1	13.4	2.9	1.8	3.4	9.5	1.4	1.5	2.8	2.7	2.1	1.5	8.6	10.7
74	Erucic acid	0	0	0	0	0	0.6	0	0	0	0	0	0	2.2	3.1	3.6	1.4	4.2	3.3	3.4	1.2	0	1.3	3.1	6	3.9	3.3	0.9	0.7	1.1	0.9	2.2	0	0.4	0	9	8
75	Erythritol	1.1	1.4	1.5	1.5	2.5	4.9	2.2	0.9	2.7	0.2	0.3	1.1	1.6	1.8	1.6	4.6	1.7	3.2	1.9	2.4	1.6	2.1	2.2	3.2	3.3	1.4	2.2	1.9	1.2	1.6	1.2	1.7	2.5	2	3.4	4.4
76	Erythronic acid	5	7.7	7	5.1	1.6	4.5	3.3	1.2	2.6	0.9	1.6	1.4	4.8	13.4	11.4	2	5.5	3.2	2	4.5	3	4.5	2.5	2	0	0	0	8	5.3	4.4	7.7	2	3.1	5.5	0	1.8
77	Ethanolamine	123.2	95.9	132	131.3	99.2	121.1	112.5	168.3	24.5	17.8	24.1	12.5	116.9	116.2	112.6	115.5	93.4	121.3	133.5	223.2	134.5	234.8	115.6	27	117.8	123.7	119.3	147	219.6	128.5	221.3	141.6	14	16	226	31.8
78	Formic acid	25.2	34.1	14.5	30.8	28.3	29	188.5	0	38.1	49.3	32.3	0	342.1	0	428.5	33	592	362.6	0	313.5	0	0	178.8	0	345.5	0	0	88.2	0	83.5	0	653	44.9	0	183.5	0
79	Fructose	4.7	5	1.3	5.6	3.1	11.6	4.3	3	1.2	8	5.1	11	3.3	48.5	9	3.7	7.8	1.4	1.7	1	2.1	10.4	3.7	2.5	6.1	16.2	9.7	13.1	8.4	5.8	3.8	7.7	1	9.4	5.9	2.3
80	Fructose-6-P	1.2	0.5	2.3	0.7	1.1	0.8	1.9	0	1.2	0.3	0.5	0.6	3.7	3.4	0.7	0.5	2	3.2	1.4	1.5	0	3.5	0.5	1.6	2.1	5	3	4.4	4	0.8	4	4.6	0.6	0.9	1.4	1.9
81	Fumaric acid (Fumarate)	0.9	0.8	1.1	1.2	2.1	1.4	0.7	1	1.8	0	0	0	0.9	0.8	1.9	0.8	0.8	1.2	0.9	1.5	1.1	1.6	3.9	1.9	1	1.2	0.5	1.4	1	0.9	1.5	0.9	0	0	1	1.7
82	GABA	0	0	0	0	0.8	1.7	0.9	0	0	0	0	0	1.6	0	1.5	0.4	0.2	0.4	0	0	0	0.3	0	0.8	0	0.7	0	2.7	0	0.5	1.7	0	3.9	0	18	0.5
83	Galactofuranose	2.8	2.3	1.7	5.4	11.3	12	12.3	3.9	4.4	8.5	6.2	11.5	22.1	21.7	11.2	16.6	5.2	5.6	21.3	18.5	4.3	9.3	3.9	0	1.2	5.5	3.2	39.9	5.6	4.8	5.8	7.5	8	10.1	7.5	0
84	Galactopyranose	0	0	0	0	8.1	10.8	19.4	0.8	0	0	0	0	78.2	37.4	15.4	7	3.3	108.5	16.9	104	0.9	45.7	15.8	12.1	21.2	14.6	11.8	8	35.8	8.7	3.9	13.5	7.4	0	18.7	20.9
85	Galactose	119.6	113.7	38	238	142.8	89.2	117.3	29.6	380.5	12.7	14.6	34.1	160.3	153.1	94.3	96.5	115	209.2	16.7	113.7	21.8	95.5	28.8	6.3	29.2	33.8	14	184.8	177	10.3	19	115.1	9.8	47.1	32.3	34.1
86	Galacturonic acid	1.1	1.3	3.4	0	0	1.9	0	0.1	0	0	0	0.1	0	2.6	0	0	0	0	11.4	0	0.1	0	0.1	0.1	0	0	0	0	0	0.7	5.1	0	0	0.1	0	0.7
87	Glucoheptulose	1.6	1.2	0.8	1.4	1.2	1	1.5	0.5	0.4	1.1	1.3	0.1	1.3	0	1.3	0.6	0.8	0	0.8	0	0.5	0	0.8	0	0.4	0	0	0	0	0.4	0.8	0.1	0	0.1	0	1
88	Gluconic acid	36.9	31.1	14.4	24	12.5	16.3	13	13.1	1	1.3	1	0.3	5.9	22.4	7.6	6.9	14.7	14.1	14.3	22	15.5	24.1	48.3	4.3	17.7	66.2	22.5	45.8	68.1	53.2	21.7	40.7	0.3	0.5	3.2	1.1
89	Gluconic acid-1,4-lactone	1.8	2.8	0	3.1	0.6	1.5	1.2	2.7	0	8.7	5.9	2.4	13.8	11.4	4.3	14.1	2.6	0	21.3	16	3.1	4.7	7	0	4.4	30.6	3.5	39.9	30.9	5	6.8	3.3	8	3	5.4	1.3
90	Gluconic acid-1,5-lactone	13.8	12.6	5.4	9.7	8.6	10.2	8.3	13.2	0.3	1.3	0.8	0.6	34	11.8	7.6	4.6	24.8	15.7	9.3	6.6	21.4	32.5	26.7	2.9	45.8	38.4	25.8	3.9	53.6	28.9	7.3	48	5.8	4	3.8	4.3
91	Glucopyranose	0	0	0.3	0	0.5	3.7	3.4	0.3	0	0	0	0.7	30.2	28	4.3	1.2	2.9	46.4	8.5	84.8	0.3	26.6	9.2	0.3	3.6	23.3	4.7	11.8	12.7	4.7	1.1	6.9	9.4	0.5	10.7	5.4
92	Glucose	524.6	671.2	274.3	661.1	215.7	447.9	449	164.5	1723.5	42.6	74.2	83.8	1004.7	778.5	450	651.3	587.4	1133.6	306.8	625.2	135.5	537	139.8	35.3	453.9	644.9	790.6	851	396.4	756	697.6	452.3	119.1	52.2	852.5	107.9
93	Glucose-6-P	3.3	2.9	5.7	3.1	1.6	1.3	17.7	1.1	2	1.1	1.5	1.8	3.7	2.7	8	2	1.2	8.5	2.4	2.5	1.3	11.2	2.3	0	6.6	1.4	6	7.6	14.7	4.7	0.6	10.1	0.9	1.7	20.4	11
94	Glucuronic acid	0.4	0.5	4.7	0.7	1	0	0	0	0	0	0	0	1.1	10.2	8.6	0	0	0	0	7.4	0	5	0	0	0	0	0	6	0	0	1.2	0	0	0	2.1	0.4
95	Glutamic acid (Glutamate)	269.7	235.5	35.8	183.4	182	174.6	209.8	7.3	30.9	60.1	48.3	11.4	176.8	124.4	187.3	201.5	193.2	121.5	46.5	198	6.1	143.4	3.9	19.8	90.5	181.5	200.3	199.2	90.6	120.8	99.9	127.4	0	14.7	201.3	0
96	Glutaric acid	0	0	0.2	0	0	0	0	0.9	0.8	0	0	0.3	0	0	0	0	0	0	0	0	1.5	0	0	0	0	0	0	0	0	0	0	0	0	0.2	0	1.5
97	Glyceric acid	14.2	8.6	10.8	15.2	0.9	1.7	1	6.6	3.8	3.2	4.4	2.5	3.9	1.2	2.1	15.7	2.8	4.6	1.8	12.4	6.8	2.3	2.8	3.4	5.7	3.8	2.2	2.5	17.4	2.8	10.7	1.4	4	2.5	12.3	17.4
98	Glycerin	54.4	17.7	22.8	19.1	185.8	52.7	51	8.1	13.7	24	15.5	11.7	272.1	19.8	205	16.2	41.7	61.6	0	348.6	11	24.8	0	0	0	12.6	0	195	0	76.3	216.5	94	0	9.3	38.6	0
99	Glycerol	166.4	121.1	91.6	95.1	131.8	110.8	63.2	101.4	53.4	53	70.5	35.3	67.1	114.9	136.1	88.1	123.1	21.1	44.4	69.7	145	65.2	33.4	14.2	54.6	112.8	53.3	6.5	94	17.1	54	48.8	36	58.7	78.9	72.9
100	Glycerol-2-P	4.1	2.9	0.5	2.8	1.2	1.2	2.1	1.1	5.5	2.6	2.6	0.4	4.4	2	1.8	1.1	1.6	1.7	1.6	5.4	1.2	2.6	1	3.2	1	1.4	1.4	6.9	1.9	1.2	3.3	1.3	0.7	0.6	1.2	0.5
101	Glycerol-3-P	25.9	19.6	17	23.6	40.4	25.1	29.2	28.9	111.4	14.4	13.4	10	45.4	52.4	33.1	19.9	16.7	38.7	33.4	78	30	28	32.1	61.7	21.5	47.2	26.6	57.2	43.2	26.8	37.2	44	45.3	7.2	40.4	25.1
102	Glycine	232.2	201.3	55.9	226.1	202.5	215.2	39.2	53.8	32.4	152	103.1	55.3	263	194.5	215.3	115	29	161.7	49	373.4	54.2	19.6	30.9	41.2	35.8	66.3	25.2	167	57.2	41.4	82.2	76.3	29.8	70.6	36.8	40.4
103	Glycolic acid	2	1.6	2.5	1.4	1.8	3.4	3.1	2.1	1.2	0.5	0.5	2	8.1	3.2	8.9	11.7	7	7.3	5.3	12.1	3.3	11.4	9.5	13.8	10.3	10.9	5.8	4.4	5	10.2	7.3	7.9	22.1	1.3	7.7	18.2
104	Guanine	2.2	2.4	0.7	4.2	1.7	1.7	1.9	1	12.7	0.9	0.7	0.2	1	1	1.7	1.4	1.1	0.5	0.7	2.2	1.4	1.5	0	1.1	1	0	1.5	4.1	0.2	0.6	0.7	0.7	0	0.2	0	0
105	Heptadecanoic acid	0.9	0.9	0.5	0.8	4.8	5.4	3.2	0.6	1.4	1.5	1.9	0.6	11	37	2.7	1.9	7.1	12.2	13.4	16.8	0.4	26.5	13.5	21.1	1.6	17.9	1.4	2.4	1.1	1.1	7.2	1.4	2.8	1.2	25.1	16.8
106	Heptanoic acid	0	0	0	0	0	0	0	23.6	0	0	0	3.8	0	0	0	0	0	0	0	0	16.2	0	0	0	0	0	0	0	49.7	0	0	0	24.4	4.1	0	751.9
107	Homoserine	0	0	1.1	0	2.4	2.1	1.6	1.1	0	2.5	1.9	0.4	0	4.9	2.2	4	5.3	3.6	2.4	0	0.8	3.7	3.1	4	10.5	10.5	4.7	13.2	11.9	1.7	2.2	2.7	6.2	0.3	10.4	7.7
108	Hydroxylamine	12.2	17.2	32.6	18.7	10.1	15.8	14.2	30.9	25.1	23	28.5	35.3	12.1	9.9	14.3	14.8	13.5	8.8	23.1	9.4	28.5	15.7	12.7	23.2	13.5	12.8	8	6.7	13.2	14.2	9.6	8.5	21.2	28.2	14.1	19.8
109	Hydroxyproline	0.5	0.5	0.4	0.7	2.6	1	0.6	0.5	0.4	0.4	0.6	0.3	0	2	0.9	0.8	0.3	0.3	0.3	1	0.5	0	4.6	0	0	0.3	0.3	0.9	0	0	0.4	0	0	0.3	5.1	4.8
110	Inosine	0.8	0.8	0	0.6	3.9	2.2	2.4	0	0.2	0.8	1.4	0.1	5.3	5.5	2.3	2.2	0	6	1	3.9	0	4.2	1	0	0	1.1	0	1.1	2.2	2.9	4.5	2.8	0	0.1	1.1	0
111	Inositol-P	0.3	0.3	0.3	0.2	1	0.9	1.2	0.2	1.6	0	0	0	7	5	1.8	0.5	0.8	5.4	3.1	23.4	0.2	3.3	1.9	0	1.8	1.8	0.9	8.3	7.5	0.9	1.6	4	0.3	0	3.8	2.6
112	Inositol, muco-	0	0	0	0	3.5	3.4	3.6	0	0	0	0	0	0.5	0.5	13.8	1.3	1.1	0.7	1	0	0	0.6	2.5	1.5	0.3	3.3	0	3.3	0	0.6	0.4	0	1	0	0	0
113	Inositol, myo-	47.3	42	22.2	56.8	43.7	40.2	35.2	20.1	107.3	21	23.8	15.2	134.9	40.5	77.5	43.2	19	45	33.6	110.5	31.6	36.2	21.4	38.1	33.7	33.7	32.3	82.9	27.2	25.7	51.1	39.4	26.8	30.7	26	58.9
114	Inositol, scyllo-	3.7	2.8	1.3	5.5	1	1.4	0.8	1.4	1.9	1.2	1.7	0.6	4.4	11.8	11.1	2.8	1.1	2.8	4.5	15.7	1.2	2.2	0	1.2	1.4	2.6	2.8	7.9	3	2.5	0.9	1	1.4	0.9	3.2	5.6
115	Isoleucine	82.1	67.8	10.9	82.6	62	60.2	52.4	8.3	162.4	58.5	34.4	18.6	52.9	69.1	48.1	26.4	10.3	51.8	9.5	79.5	10.7	0	10.8	45	0	9.2	0	117.8	4	142.4	111	5.2	0	21.8	6.3	0
116	Lactic acid (Lactate)	5012	4695.2	1329	5024.1	4615.5	2815.1	3734.8	1766.9	3814.1	2912.2	2608.6	1973.5	2971.6	4830.9	3621	4432.9	3717.2	2314.3	3300.1	3031.4	2093.1	2358.5	2029	576.7	3551.5	7263.4	2038.3	2151.5	3333.3	3767.2	3883.5	2919.6	2696	1943.2	4234	1497.5
117	Lanosterol	0	0	0	0	6.6	1.6	2.1	0	0	0	0	0	7.4	1.6	5.6	4.5	2.2	1.3	12	5.7	0	1.1	2.7	2.2	1.5	1.5	3.4	8.8	3.1	2.5	13.2	3.3	5.9	0	1.6	5.6
118	Leucine	187.2	154.1	14.8	105.8	130.9	139.6	139.1	6.6	211.4	33	29.3	6.9	74.4	58.5	122.6	63	7.3	122.6	18.4	157.9	15	3.8	3.5	52.5	2.4	20.4	3.6	505.4	4.9	126.9	146.1	6.6	0	10.9	9	10.6
119	Lignoceric acid	0	0	0	0	3.9	0.7	3.7	0	0	0	0	0	10.4	2.2	3.8	2.7	0.9	1	3.5	11	0	1.4	2.6	6.6	2.3	5.7	2.7	2.5	1.8	3	4.4	1.5	4.8	0	2.1	4.8
120	Lysine	31.2	33.2	6.3	23.9	104.7	52.4	31.8	9.7	90.3	7	7.8	7.6	100	35.8	84	33.7	30.4	17.9	8.9	137.1	10.2	31.9	7	18.3	0	6.4	0	20	1.8	6.2	29.1	21.8	0	10.7	6.6	0
121	Malic acid	11.2	12	8.6	15.2	12.9	11.3	11.3	7.3	13.6	1.2	1.2	4.6	14.5	13.2	9	31.8	11.2	5.5	10.9	7.8	9.7	15.1	10.8	2.5	12.1	11.8	11.8	11.3	12.2	11.9	21.1	12.1	1.4	8.4	11.8	1.9
122	Maltose	480.1	356.4	199.9	453.8	343.5	81.8	107.3	199.1	913.1	149.8	87.8	178.2	2597.2	837.4	474.1	137.7	942	112.3	288.2	86	180	793.5	220.5	234.5	618.5	661.7	528.5	150.3	464.4	151.2	460.7	449.1	160.6	183.8	363.6	282.1
123	Mannitol	0	0	0	0	1.3	50.4	26.7	0	0	0	0	0	9.8	23	37.3	4.3	0	0	5.1	5.8	0	6	8	13.7	0	4.8	0	31.8	3.9	6.1	0	0	0	0	4.5	3.8
124	Mannose	1.6	1.3	0.6	2.1	0	1.2	0.8	0.9	0	0	0	9.6	3	0	1.6	0	0	51.1	3.1	0	1.3	0.5	0	3.8	0	0	0	0	5.4	5.7	0	2	0	8.3	0	5
125	Mannose-6-P	2.1	3	2.2	3.8	1.9	2.4	2.2	0.2	4	0.2	0.4	0.1	3.7	5.3	2.3	2.8	0.6	4.6	2.3	0.8	0.2	5.3	0.5	0	1	1.2	1	1.1	0.9	0.8	0	5.9	1.5	0.1	0	7.3
126	Methionine	12.6	14.2	1.2	31.1	20.7	23.4	21.6	1.1	27.7	6.5	4.8	0.9	9	7.6	29.8	14.5	0	6.1	17.8	33.5	1.3	0	0.9	10.2	0	0	0	62.3	0	12.8	13.7	1.5	0	0.6	0	0
127	Methyl-hexadecanoic acid	0	0	0	0	0.8	2.8	1.8	0	0	0	0	0	2.1	6.7	4.8	3	2.3	1.3	0	1.9	0	1.5	12.9	42	0.5	3.2	3	0	0	1.4	2.1	1.2	0	0	4.5	26.4
128	Methyl-inositol	0.7	0.8	3.6	0.6	0.6	0.7	1.5	4.3	6.1	2.5	2.7	7	9.7	5.2	61.6	17.6	6.8	14.7	5.1	6.3	4.4	9.5	3.3	2.5	2.5	5	1.7	0	3.6	1.1	1.5	0.8	4.4	5.1	0	4.6
129	Monomethylphosphate	0	0	0	0	0.8	0.6	1.3	0	0	0	0	0	0.5	0.3	0.3	0.7	0.4	0.4	0.3	0.5	0	0.4	0	0.3	0	0	0.2	0.5	0.5	0.2	0.6	0.4	0.9	0	0.6	0.7
130	N-Acetyl glucosamine	1.6	0.8	0.1	1.2	0.9	0.9	0	0.2	0	0	0	1.5	1.4	0.7	3.1	0.5	1.1	3	2.3	0	0.3	0	0	0	0	0	0	0	0	0	1.9	0.3	0	1.8	0	0
131	N-Acetyl-Lysine	40.8	45.4	5.3	41.1	34.6	43.4	4.6	5.5	107.1	20.8	13.2	4.3	39.6	23.4	44.8	26.8	5.9	25.9	4.1	35	9.1	6.7	18.1	10.7	3.6	20.1	3.8	62.6	9.5	11.6	31.2	11.8	0	15.4	13	11.3
132	N-Acetyl-serine	1.3	1.4	1.4	1	4.1	3.1	0.8	1.6	4.4	1.9	1.7	0.5	3.2	1.9	4.7	1.4	0.9	2.2	2.9	3.3	1.3	0.7	0.9	0	0	2.1	1.3	4.3	0	2.5	2	0	0	0.3	1.3	0
133	N-Acetylglutamic acid	171.4	176.8	18.2	141.9	113.3	94.1	59.5	12.5	19.7	111.2	147.3	27	172.4	141.6	56.9	46.7	34.8	96.2	34.7	171.1	16	15.9	32.4	16.6	35.3	41.5	21.1	74.8	21.3	72.3	86.9	40.9	28.5	20.5	47	12.7
134	Nicotinic acid	0.5	0.3	0.2	0.5	0	0.2	0	0.4	0.8	0.2	0.2	0.3	0.1	0	0.5	0	0	0.1	0	1.4	0.3	0	0	0.1	0	0	0	0.4	0	0	0	0	0	0.3	0	0.1
135	Nonanoic acid	3.9	2.4	1.4	3.8	2.4	1.6	1.6	1.9	2.9	1.9	2.3	2	1.3	1.2	1.1	2	1.3	1.5	1.6	1	3.3	3.7	2.6	2.9	1.9	6.8	1.3	1	1.2	1.2	1.9	1.9	2.7	2.7	1.9	3
136	Octadecanoic acid	83.5	161.4	91.6	96.9	75.6	196.6	64.6	95.5	87.1	77.6	145.3	75.8	490.6	381.7	500.6	330.7	459.3	453.2	458	447.5	128.1	392.2	581.5	1631.3	323	823	201.5	272.5	192.1	185.8	273.7	308.7	227.3	72.6	844.1	1374.5
137	Octadecanol	0.2	0.2	0.3	0.2	3.4	3.7	3.1	0.2	0.3	0.3	0.2	0.3	1.8	6.9	3.8	1.6	3.8	2.3	2.1	3.8	0.3	4.3	4.7	26.1	2.1	34.3	3.3	2.9	3.4	1.5	3.1	2.3	1.9	0.2	5.5	27.3
138	Ornithine	0	0	0	0	196.5	83.7	98.6	0	0	0	0	0	36.2	35.1	22.1	28.2	7	22.5	120	12.1	0	2.7	9	0	1.4	13.2	2.7	7.7	1.7	6.5	3.9	7.5	0	0	13.4	3.3
139	Palmitelaidic acid	0.2	0.2	0.7	0.3	0.3	9.2	0.3	0.8	1	0.6	0.7	0.4	6.5	8.9	12.6	1.3	0.3	0.2	0.8	9.8	1.1	2.5	9.1	21.5	2	21.8	2.8	6.4	1.5	1.7	8.5	0.2	0.6	0.4	20.5	22.4
140	Palmitic acid	75.6	97.8	68	65.4	44.4	352.8	80.9	86.5	104.8	72	84.2	59	711.4	522.6	65.4	500	740.4	628.8	662.8	573.8	74.9	655.5	877.9	1899.8	444.1	996.3	343.3	386.7	284	288.3	361.2	260.2	319.1	52.7	1122.8	1723.3
141	Panthotenic acid	0.3	0.2	0.2	0.2	0	0	0	0.3	0.1	0	0	0.2	0	0	0	0	0	0	0	4.2	0.4	0	0	0	0	0	0	0	0	0	0	0	0	0.2	0	0
142	Pentadecanoic acid	1.4	1.3	2.1	1.5	6.7	6.9	35.5	1.5	0.2	0.8	1.1	1.3	13.3	48.7	36.9	12.2	9.7	20.7	15	11.8	2.3	27.2	10.9	4.4	16.3	35.6	2.4	48.9	35.5	8.6	10.8	9.8	23.3	0.7	11.6	12.1
143	Phenylalanine	160.1	119.4	4.5	88.8	80.6	81.2	75.3	3.5	112.3	32	26.5	4.2	63	62	90.6	126.3	95.7	44.6	88	171.3	5.2	94	9.2	36.8	3.7	10.8	9.1	46.6	0.3	3.1	73.7	11.4	0	5.3	2.7	1.9
144	Phosphate	355.1	253.5	141.4	284.1	244	456.6	261.1	201.1	703.9	162.8	219.9	167.5	637.9	795.8	688.7	524.8	377.6	460	368.3	711.5	191.3	910.5	495.9	249.7	253.3	239.6	204	641.3	178.6	186	635.7	309.9	201.2	225.5	240.9	351.7
145	Proline	3.5	3.2	1.3	4	11	5.7	0	4.5	20.7	3.3	2.8	2.4	63.2	17.8	5.8	0	12.9	32.4	3.5	63.9	4.8	12.7	3.1	6.6	0	0	0	63.4	3.4	9.8	6.1	21.1	0	2.9	0	1
146	Propanoic acid	43.7	69.3	32.2	77	80.7	76	0	68.4	50.5	32.3	24.7	26	188.4	208.4	82.6	60	236.2	39.4	100.8	0	80.1	0	149	0	63.6	180.6	35.3	167.4	874.4	0	366.9	147.9	102.8	33	39.7	36.8
147	Putrescine	3.6	4.3	19.7	4.3	0	0	0	10.5	2.6	1.9	1.4	11.2	2.7	2.6	2.4	2.3	0	1.2	0	3.7	16.5	0	0	83	0	0	0	13	17.7	0.8	1.7	3.4	67	11.9	0	73.6
148	Pyroglutamic acid	57.2	56.5	131.3	29.6	30.4	43.9	55.1	22.7	46.8	32.2	32.5	23	450.5	414.2	65	18.2	46	214.9	27.2	326.2	19.6	91.6	59.5	28.6	158.5	118.9	93	431.9	94.8	108.1	132.4	128.4	29.8	34.2	107.5	68.2
149	Pyrophosphate	0	0	0	0	21.1	30.2	31.6	0	0	0	0	0	9.9	6.4	14.6	7.4	5.7	7.8	1.6	18.3	0	13.1	4.3	13.7	1.8	2.4	0	7	1.3	3.6	2.9	3.4	0	0	7.7	4.8
150	Pyrrole-2-carboxylic acid	0	0	0	0	0.3	0.4	1.4	0	0	0	0	0	0.8	0.3	0	0.9	0.4	0.3	0.1	0.5	0	0.4	0.5	0.6	0.2	1.3	1.3	0.8	1.4	0.7	0.3	0.5	0.5	0	0.2	0.8
151	Pyruvic acid	9.3	6.4	10.4	14.8	14.6	12.7	5.8	12.8	17.8	7	6.3	7.1	12.3	8.5	10.1	15.2	7	13.7	12.3	62.1	15.2	7.5	0	8.4	16.3	19.1	10.1	42.3	54.4	12.7	5.8	7.2	19.1	8.3	11.2	39.4
152	Ribitol	1.3	1.5	1.8	0.9	6.9	0	13	1.6	1.3	0	0	0.5	26.5	11.5	6.1	6.1	10.8	19	1	12.1	1.5	18.1	1	13	0.6	0.4	0.6	0.4	1.1	0.9	1.3	1	0.1	0.4	0.7	1.8
153	Ribose	44.2	39.5	27.3	59.7	21.4	11.4	38.7	47	72.3	11.4	21.2	8.6	102.9	27.8	25.8	29.7	25.4	20.7	43.6	102	44	15.1	47.6	9.6	28.1	14.9	18.7	91.9	18.2	17.8	18.8	22.2	8.7	27.1	17	10.1
154	Ribose-5-P	0.5	0.3	0.5	0.5	1.6	0	0	0.2	0	0	0	0	0	0.5	0	0	0	0.8	0	0	0.3	0.8	0	0	1.7	0	0.8	0	0	0	0	0.6	0	0	0	3.1
155	Sedoheptulose	21.4	33.2	0.9	29	12.8	10	17.6	0.9	5.1	3.2	3.8	3	21.4	19.1	12	15.1	10.5	15.2	9.6	21.1	0.8	10.9	7.2	4.9	3	2.6	13.1	42.3	2.8	2.6	17.5	19.3	3.7	1.3	3.4	0.3
156	Serine	83.3	25.6	6.1	106.6	157.9	113.5	35.9	8.6	180.6	43.4	30.8	33	253.1	86.7	196.3	83	8.1	83.2	10.9	234.3	29.4	5.4	12.4	11.8	12	11	3.6	278.4	8.2	8.9	40.6	6.4	4.7	42.2	6.2	5.8
157	Sorbitol	7.9	7.4	5	8.5	7	21.8	2.1	6.5	1	2.9	3.3	2.3	5	19.5	8	4.8	3.7	4.2	7.2	21.1	6.6	2.7	1	5.6	3.1	3.9	4.7	3	3.1	6.1	3.8	3.6	3	2.8	2.8	4.2
158	Spermidine	0.9	1	0	1	0.9	0.9	0	1.2	2.3	0.8	1	0	2.6	0	4	0	0	0	1.3	4	1.4	0	1.2	0	0	0	0	3	0	0	2.6	1.7	1.2	0	0	0
159	Succinic acid (Succinate)	197.2	128.5	38.7	198.3	172.3	154.1	165.4	36.8	194.8	66.7	49.4	34.6	144.9	82.1	155.7	283.5	126	86.9	93.2	93.1	43.5	134.1	130.6	469.2	28.4	70.8	35.1	264.7	23.2	27.5	30.2	20.7	41.2	39.7	33.1	471
160	Sucrose	0.4	0.9	0.8	0.2	4.9	3.9	4.9	0.2	3.8	0.1	0.3	0.8	6.3	13	10.1	3.1	1.7	12.6	5	12.6	2.7	6.7	5.4	2.1	5.1	8.4	2.4	1.4	2.9	5.5	2.5	6.8	2.2	0.1	6.6	3.1
161	Tetradecanoic acid	8.2	8.6	13.7	10.8	15.1	15.4	21.4	11.9	7.6	7.9	8.3	9.4	26.6	22.1	30.8	32	18.7	19.2	26.8	18.3	9.9	21.8	43.7	74.3	11.8	62.9	8.5	8.2	10.9	8.4	8	11.8	52.5	8.1	73.9	91.5
162	Tetradecanol	0.5	0.5	0.4	0.7	1	0.3	0.6	0.6	1.9	0.8	0.8	0.4	1.5	0.9	1.5	2.5	1.8	0.7	0.6	5.1	0.6	7.9	2.9	0	2.4	1.8	3.6	0	3.7	1	1.5	0.8	1.3	0.4	1.7	1.5
163	Threitol	0.9	1	0.5	0.8	6	0	0.5	0.5	0	0	0	1	0.7	0	0.5	2	0.6	0	0.5	0.8	0.6	0.5	0.5	1.6	0	0	0.2	0	1.7	0.4	0	2.9	3.4	0.9	0	4
164	Threonic acid	2.2	2.7	1.8	1.8	0.5	0.7	1.7	0.3	1.1	0.2	1.5	3	4.8	4.6	1.9	1.7	9.8	2.1	0.4	1.5	0.3	7.4	0.4	2.7	3.6	3.7	2.8	3.9	2.4	0.8	1.4	2.7	2.5	4.1	1.8	1.9
165	Threonine	44.3	69.4	18.8	45.9	130.5	98.1	43.3	13.2	83.9	20.7	11.7	10.5	383	69.8	107	63.1	49.9	54.2	14.9	361.4	21.5	45.5	16.9	16	7.7	25.7	8	257.7	8.1	20.5	30.3	40.8	5	20.4	7.5	5.6
166	Thymine	0.2	0.3	0.1	0.3	1.5	16.3	2.5	0.1	0.3	0.1	0.2	0.1	7.4	11.9	1.7	1.6	0	7.5	1.2	7.1	0.3	5.1	0	24.5	0	0	0	1.9	8.9	2.3	4.7	4.7	0	0.2	0	0
167	Triacontanol	0	0	0	0	0.6	0.4	0.5	0	0	0	0	0	0	0.4	1	1.2	1	0.5	0.4	0	0	0.4	2.8	0.4	3.3	2.4	1.1	0	1	0.5	0.9	0.6	0.8	0	0.6	3.3
168	Triethanolamine	0.5	0.5	0.5	0.3	0.5	16.5	0.5	0.3	0.4	0.2	0.2	0.7	20.7	28.8	33.9	17.9	15.7	13.6	10.6	14.2	0.4	10.4	33.7	57.4	16.9	56.4	19.2	4	37.9	11.5	15.8	6.7	32.4	0.3	61.1	58.8
169	Tryptophan	7.3	4.8	0.9	8.3	29.7	25	1.3	0.7	6.9	2.9	2	0	23.9	4.5	8.9	1.8	0	6.2	6.3	20.5	0.7	6.1	0.8	12	0	0	0	26.8	0	6.9	6.6	5.7	0	0	0	0
170	Tyramine	1.5	1.3	4.8	1.5	1.6	1.1	0	10.5	58.4	0	0	5.9	34.7	0	1.2	0	0	0	0	0	12.1	0	0	140.1	0	0	0	0	10.3	0	10.7	10.1	40.6	8.6	0	149.9
171	Tyrosine	69	56.7	2.2	45.9	125.2	93.4	21.3	2.6	41.6	15.7	16.5	2.4	105.5	54.8	113.6	24.5	8	40.8	21.7	168.7	18.1	13.6	18.2	55.4	19.1	12.2	18.4	227.3	14.7	12.5	67.5	10.3	10.6	3.7	17.6	8.7
172	Uracil	1.3	1.1	1.4	0.9	1.2	23.5	1	1.9	21.7	0.8	0.7	1.2	5.8	0.3	1.6	3.6	0	0.8	1.5	8.3	1.3	0	0	3.5	0	0	0	22.6	0	12.6	16.4	1.4	0	2.2	0	0
173	Urea	47.1	45.1	40.9	24	151.2	85.8	11	33.6	19.8	0	0	50.5	107	27.8	278.6	53.8	71.1	102.3	24.2	48.9	25.3	84.6	29.4	36.5	49.1	32.3	32	94.9	54.7	65.1	64.8	80.8	30.1	83.3	92.8	17.2
174	Uric acid	2.5	3	0	3.1	2.3	0.4	0	0	2.8	0	0	0	0	0	0.5	0	0	0	0.6	4	0	0	0	0	0	0	0	0	0	0	0.6	0	0	0	0	0
175	Valine	45.5	29.3	15.8	43.7	69.6	64.5	48.5	13.9	93.4	31.6	18.5	16.6	276	142.2	53.4	45	110.5	94.9	102	111.6	15.4	48.2	10.2	48.5	46.8	38.8	48.5	28	14.9	61.3	56.2	43.4	12.2	15	14	6.7
176	Xylitol	0	0	0	0	1.4	0.4	1.4	0	0	0	0	0	4.5	0.7	0	0.4	0.5	2	1.8	1.3	0	4.8	4.1	1.1	0.5	0.3	0.8	3.5	1.1	3.4	1.3	0.8	0.2	0	0.6	1.8
